# Supplementary material
Source: PubMed Central journal article supplement (PMC4137705)
Supplement: supp_msu175_evo-bon-supdata-3-26-14v2.pdf [file supp_msu175_evo-bon-supdata-3-26-14v2.pdf]

## Eight Supplemental Tables

**Table S1. Accession numbers.**

| Symbol                      | GI number             | Protein number         | Species <sup>a</sup>                 |
|-----------------------------|-----------------------|------------------------|--------------------------------------|
| Ac LOC101846096             | 524907846             | XP_005109034           | <i>Aplysia californica</i>           |
| Bf BRAFLDRAFT_240325        | 26081752              | XP_002603636           | <i>Branchiostoma floridae</i>        |
| Bf BRAFLDRAFT_85511         | 26082794              | XP_002608924           | <i>Branchiostoma floridae</i>        |
| Ce NCL-1                    | 17554338              | NP_498684.1            | <i>Caenorhabditis elegans</i>        |
| Ce NHL-2                    | 17553200              | NP_498026.1            | <i>Caenorhabditis elegans</i>        |
| Ci_zf(bbox/ring)-1          | 19308307              | NP_001122371           | <i>Ciona intestinalis</i>            |
| Ci_zf(bbox/ring/phd)-1      | 11834420              | NP_001071923           | <i>Ciona intestinalis</i>            |
| Ct CAPTEDRAFT_102254        | 44372503              | ELU12781.1             | <i>Capitella teleta</i>              |
| Ct CAPTEDRAFT_90967         | 44369524              | ELT96190.1             | <i>Capitella teleta</i>              |
| Dm Bonus                    | 24648457              | NP_524724.2            | <i>Drosophila melanogaster</i>       |
| Dm BRAT                     | 17136846              | NP_476945.1            | <i>Drosophila melanogaster</i>       |
| Dm MeiP26                   | 21355671              | NP_652022.1            | <i>Drosophila melanogaster</i>       |
| Dr TIF1- $\delta$ /TRIM66   | 52848502              | XP_005166454           | <i>Danio rerio</i>                   |
| Dr TIF1- $\alpha$ /TRIM24   | 67514537              | NP_001002870           | <i>Danio rerio</i>                   |
| Dr TIF1- $\gamma$ /TRIM33   | 34730025              | NP_001002871           | <i>Danio rerio</i>                   |
| Dr TRIM71                   | 32667466              | XP_690252.5            | <i>Danio rerio</i>                   |
| Gg TIF1- $\alpha$ /TRIM24   | 51315978              | XP_416340.4            | <i>Gallus gallus</i>                 |
| Gg TIF1- $\beta$ /TRIM28    | 51323955              | XP_428095.4            | <i>Gallus gallus</i>                 |
| Gg TIF1- $\delta$ /TRIM66   | 51318634              | XP_004941449           | <i>Gallus gallus</i>                 |
| Gg TIF1- $\gamma$ /TRIM33   | 51322520              | XP_418009.4            | <i>Gallus gallus</i>                 |
| Gg TRIM71                   | 16783040              | NP_001032352           | <i>Gallus gallus</i>                 |
| Hr HELRODRAFT_130735        | 55569546              | ESN98699.1             | <i>Helobdella robusta</i>            |
| Hs TIF1- $\alpha$ /TRIM24   | 47419911              | NP_056989.2            | <i>Homo sapiens</i>                  |
| Hs TIF1- $\beta$ /TRIM28    | 5032179               | NP_005753.1            | <i>Homo sapiens</i>                  |
| Hs TIF1- $\delta^*$ /TRIM66 | 20997709 <sup>b</sup> | NP_055633 <sup>b</sup> | <i>Homo sapiens</i>                  |
| Hs TIF1- $\gamma$ TRIM33    | 74027249              | NP_056990.3            | <i>Homo sapiens</i>                  |
| Hs TRIM37                   | 52487176              | NP_001005207           | <i>Homo sapiens</i>                  |
| Hs TRIM71                   | 84993742              | NP_001034200           | <i>Homo sapiens</i>                  |
| Mm TIF1- $\alpha$ /TRIM24   | 94420998              | NP_659542.3            | <i>Mus musculus</i>                  |
| Mm TIF1- $\beta$ /TRIM28    | 17029584              | NP_035718.2            | <i>Mus musculus</i>                  |
| Mm TIF1- $\delta$ /TRIM66   | 45861756              | AAS78676.1             | <i>Mus musculus</i>                  |
| Mm TIF1- $\gamma$ /TRIM33   | 56404945              | Q99PP7.2               | <i>Mus musculus</i>                  |
| Mm TRIM71                   | 10994830              | NP_001035968           | <i>Mus musculus</i>                  |
| Sk LOC100367035             | 29124261              | XP_002741201           | <i>Saccoglossus kowalevskii</i>      |
| Sk LOC100372618             | 29123009              | XP_002735005           | <i>Saccoglossus kowalevskii</i>      |
| Sp LOC580275                | 39035004              | XP_785438.3            | <i>Strongylocentrotus purpuratus</i> |
| Tr LOC101061951             | 41090836              | XP_003967661           | <i>Takifugu rubripes</i>             |
| Tr LOC101064561             | 41091315              | XP_003970052           | <i>Takifugu rubripes</i>             |
| Tr LOC101073124             | 41089906              | XP_003963016           | <i>Takifugu rubripes</i>             |
| Tr LOC101076050             | 41091117              | XP_003969064           | <i>Takifugu rubripes</i>             |
| Tr LOC101078035             | 41091901              | XP_003972979           | <i>Takifugu rubripes</i>             |
| Xt TIF1- $\alpha$ /TRIM24   | 18923024              | NP_001121448           | <i>Xenopus tropicalis</i>            |
| Xt TIF1- $\beta$ /TRIM28    | 30161644              | XP_002937648           | <i>Xenopus tropicalis</i>            |
| Xt TIF1- $\delta$ /TRIM66   | 51283299              | XP_002942909           | <i>Xenopus tropicalis</i>            |
| Xt TIF1- $\gamma$ /TRIM33   | 11860117              | NP_001073032           | <i>Xenopus tropicalis</i>            |
| Xt TRIM71                   | 42593626              | F6QEU4.1               | <i>Xenopus tropicalis</i>            |

a. Taxonomy and nomenclature. Vertebrates: Human Hs, Mouse Mm, Chicken Gg, Frog Xt, Sebrafish Dr and PufferfishTr. Vertebrate closest relatives: Cephalochordate Bf, Hemichordate Sk, Urochordate Ci and Echinoderm Sp. Lophotrocozoans: Annelid Ct, Leech Hr and Mollusc Ac. Arthropod: Dm. Nematode: Ce. In the TRIM family naming is highly variable with the mouse names utilizing the TIF1 prefix and human names employing TRIM. We consistently apply both names while excluding unique names such as Ectodermin for TIF1- $\gamma$ /TRIM33.

b. The 5' extended HsTIF1- $\delta^*$ /TRIM66 was employed to generate the alignment underlying all trees. The existing prediction for HsTIF1- $\delta$ /TRIM66 does not contain a RING domain but the extended isoform we identified from genomic sequence conforms to the RING domain bearing mouse TIF1- $\delta$ /TRIM66 isoform1 (see Material and Methods and Figs. S1-4). Note the most recent release of Genbank contains a new prediction for a HsTIF1- $\delta$ /TRIM66 isoform that contains a nearly identical 5' extension (GI 530396083 and Protein XP\_005253327.1).

**Table S2. Location and probability of known domains in the TRIM family.**

| Domain Name              | Start | End  | E-value  |
|--------------------------|-------|------|----------|
| <b>Bonus</b>             |       |      |          |
| RING                     | 83    | 130  | 0.00121  |
| low complexity           | 152   | 167  | 0.00121  |
| BBOX                     | 173   | 220  | 2.91E-06 |
| BBOX                     | 235   | 276  | 1.84E-08 |
| BBC                      | 283   | 409  | 2.15E-40 |
| low complexity           | 448   | 491  | 2.15E-40 |
| low complexity           | 583   | 605  | 2.15E-40 |
| low complexity           | 612   | 627  | 2.15E-40 |
| low complexity           | 650   | 669  | 2.15E-40 |
| low complexity           | 777   | 794  | 2.15E-40 |
| low complexity           | 810   | 824  | 2.15E-40 |
| PHD                      | 899   | 944  | 8.18E-10 |
| BROMO                    | 964   | 1071 | 7.17E-18 |
| <b>HsTIF1-β/TRIM28</b>   |       |      |          |
| RING                     | 65    | 120  | 1.58E-07 |
| BBOX                     | 148   | 195  | 2.97E-12 |
| BBOX                     | 204   | 245  | 1.11E-11 |
| BBC                      | 252   | 378  | 1.98E-39 |
| low complexity           | 419   | 431  | 1.98E-39 |
| low complexity           | 525   | 551  | 1.98E-39 |
| PHD                      | 627   | 670  | 2.16E-09 |
| BROMO                    | 697   | 801  | 1.34E-08 |
| <b>HsTIF1-α/TRIM24</b>   |       |      |          |
| RING                     | 76    | 130  | 6.00E-08 |
| BBOX                     | 158   | 205  | 6.27E-11 |
| BBOX                     | 218   | 259  | 2.22E-11 |
| BBC                      | 266   | 392  | 5.55E-43 |
| low complexity           | 473   | 491  | 5.55E-43 |
| low complexity           | 499   | 514  | 5.55E-43 |
| low complexity           | 577   | 595  | 5.55E-43 |
| low complexity           | 685   | 708  | 5.55E-43 |
| low complexity           | 758   | 773  | 5.55E-43 |
| PHD                      | 828   | 871  | 3.15E-11 |
| BROMO                    | 901   | 1006 | 4.93E-39 |
| low complexity           | 1017  | 1032 | 2.00E-17 |
| <b>HsTIF1-γ/TRIM33</b>   |       |      |          |
| RING                     | 125   | 184  | 2.61E-08 |
| BBOX                     | 212   | 259  | 1.24E-09 |
| BBOX                     | 271   | 312  | 1.54E-10 |
| BBC                      | 319   | 445  | 7.55E-45 |
| low complexity           | 526   | 569  | 7.55E-45 |
| low complexity           | 637   | 649  | 7.55E-45 |
| low complexity           | 718   | 760  | 7.55E-45 |
| low complexity           | 807   | 835  | 7.55E-45 |
| low complexity           | 875   | 888  | 7.55E-45 |
| PHD                      | 889   | 932  | 4.15E-11 |
| BROMO                    | 959   | 1082 | 1.06E-29 |
| <b>Hs TIF1-δ*/TRIM66</b> |       |      |          |
| RING                     | 33    | 86   | 0.9      |
| BBOX                     | 110   | 142  | 1.16     |
| BBOX                     | 170   | 211  | 0.0238   |
| BBC                      | 218   | 344  | 2.80E-39 |
| PHD                      | 1082  | 1125 | 1.35E-10 |
| BROMO                    | 1153  | 1259 | 3.58E-27 |

**Table S3. Domain comparison between Bonus and TRIM proteins.**

|       | HsTIF1- $\alpha$ /TRIM24                                                                                       | HsTIF1- $\beta$ /TRIM28                                                                          | HsTIF1- $\delta^*$ /TRIM66                                                                       | HsTIF1- $\gamma$ /TRIM33                                                                         |
|-------|----------------------------------------------------------------------------------------------------------------|--------------------------------------------------------------------------------------------------|--------------------------------------------------------------------------------------------------|--------------------------------------------------------------------------------------------------|
| RING  | Length: 54<br>Id: 21/54 (44%) <sup>a</sup><br>Sim: 25/54 (46%) <sup>b</sup><br>Gap: 19/54 (35%)<br>Score: 94.0 | Length: 56<br>Id: 17/56 (30%)<br>Sim: 23/56 (41%)<br>Gap: 08/56 (14%)<br>Score: 78.5             | Length: 58<br>Id: 18/58 (31%)<br>Sim: 21/58 (36%)<br>Gap: 14/58 (24%)<br>Score: 52.5             | Length: 60<br>Id: 21/60 (35%)<br>Sim: 26/60 (43%)<br>Gap: 12/60 (20%)<br>Score: 89.0             |
| BBOX  | Length: 48<br>Id: 23/48 (48%)<br>Sim: 36/48 (75%)<br>Gap: 00/48 (00%)<br>Score: 151.0                          | Length: 48<br>Id: 27/48 (56%)<br>Sim: 38/48 (79%)<br>Gap: 00/48 (00%)<br>Score: 161.0            | Length: 48<br>Id: 10/48 (21%)<br>Sim: 08/48 (38%)<br>Gap: 09/48 (19%)<br>Score: 67.0             | Length: 48<br>Id: 23/48 (48%)<br>Sim: 34/48 (71%)<br>Gap: 00/48 (00%)<br>Score: 148.0            |
| BBOX  | Length: 42<br>Id: 24/42 (57%)<br>Sim: 33/42 (79%)<br>Gap: 00/42 (00%)<br>Score: 155                            | Length: 42<br>Id: 23/42 (55%)<br>Sim: 31/42 (74%)<br>Gap: 00/42 (00%)<br>Score: 145.0            | Length: 42<br>Id: 20/42 (48%)<br>Sim: 26/42 (62%)<br>Gap: 00/42 (00%)<br>Score: 119.0            | Length: 42<br>Id: 23/42 (55%)<br>Sim: 32/42 (76%)<br>Gap: 00/42 (00%)<br>Score: 150.5            |
| BBC   | Length: 130<br>Id: 29/130 (22%)<br>Sim: 65/130 (50%)<br>Gap: 08/130 (06%)<br>Score: 113.0                      | Length: 128<br>Id: 31/128 (24%)<br>Sim: 63/128 (49%)<br>Gap: 02/128 (02%)<br>Score: 119.0        | Length: 127<br>Id: 25/127 (20%)<br>Sim: 63/127 (50%)<br>Gap: 00/127 (00%)<br>Score: 133.0        | Length: 131<br>Id: 30/131 (23%)<br>Sim: 65/131 (50%)<br>Gap: 06/131 (05%)<br>Score: 103.0        |
| PHD   | Length: 46<br>Id: 26/46 (57%)<br>Sim: 34/46 (74%)<br>Gap: 02/46 (04%)<br>Score: 173.5                          | Length: 46<br>Id: 19/46 (41%)<br>Sim: 27/46 (59%)<br>Gap: 02/46 (04%)<br>Score: 115.5            | Length: 46<br>Id: 28/46 (61%)<br>Sim: 35/46 (76%)<br>Gap: 02/46 (04%)<br>Score: 175.5            | Length: 46<br>Id: 26/46 (57%)<br>Sim: 32/46 (70%)<br>Gap: 02/46 (04%)<br>Score: 169.5            |
| BROMO | Length: 108<br>Id: 39/108 (36%)<br>Sim: 58/108 (54%)<br>Gap: 02/108 (02%)<br>Score: 160.0                      | Length: 114<br>Id: 27/114 (24%)<br>Sim: 41/114 (36%)<br>Gap: 15/114 (13%)<br>Score: 55.5         | Length: 108<br>Id: 40/108 (37%)<br>Sim: 54/108 (50%)<br>Gap: 01/108 (01%)<br>Score: 165.0        | Length: 125<br>Id: 38/125 (30%)<br>Sim: 61/125 (49%)<br>Gap: 18/125 (14%)<br>Score: 151.5        |
| ALL   | Length: 1251<br>Id: 316/1251 (25%)<br>Sim: 488/1251 (39%)<br>Gap: 319/1251 (26%)<br>Score: 1000                | Length: 1171<br>Id: 269/1171 (23%)<br>Sim: 407/1171 (35%)<br>Gap: 374/1171 (32%)<br>Score: 725.0 | Length: 1448<br>Id: 311/1448 (22%)<br>Sim: 490/1448 (34%)<br>Gap: 437/1448 (30%)<br>Score: 718.0 | Length: 1302<br>Id: 323/1302 (24%)<br>Sim: 502/1302 (38%)<br>Gap: 344/1302 (27%)<br>Score: 972.5 |

a - red indicates the protein with the greatest percent identity to Bonus for that domain

b - blue indicates the protein with the greatest percent similarity to Bonus for that domain  
(identical amino acids plus conservative substitutions as defined biochemically)

**Table S4. Cuticle defects in *bonus* zygotic mutants.**

| ventralized phenotypes | <i>bonus</i> <sup>487</sup> / <i>bonus</i> <sup>21B</sup> | <i>bonus</i> <sup>21B</sup> / <i>bonus</i> <sup>EY1763</sup> |
|------------------------|-----------------------------------------------------------|--------------------------------------------------------------|
| wt (expect 100%)       | 82                                                        | 86                                                           |
| herniated head         | 04                                                        | 06                                                           |
| denticles extended     | 00                                                        | 02                                                           |
| Filzkörper defects     | 10                                                        | 04                                                           |
| partial U-shape        | 04                                                        | 02                                                           |

At least 50 cuticles were examined for each cross.

**Table S5. *bonus* zygotic suppression of *sog*<sup>y506</sup>.**

| paternal genotype         | wt | <i>dpp</i> <sup>hr4</sup> / + | <i>Medea</i> <sup>15</sup> | <i>bonus</i> <sup>21B</sup> / + | <i>faf</i> <sup>B6</sup> / + |
|---------------------------|----|-------------------------------|----------------------------|---------------------------------|------------------------------|
| wt (expect 50%)           | 62 | 56                            | 52                         | 56                              | 58                           |
| no denticles              | 30 | 12                            | 08                         | 16                              | 18                           |
| denticles present/rescued | 08 | 32                            | 40                         | 28                              | 24                           |

At least 50 cuticles were examined for each cross.

**Table S6. Maternal heterozygosity for *nedd4* partially rescues *dpp*<sup>hr27</sup> haploinsufficiency**

| maternal genotype | wt              | <i>Medea</i> <sup>17</sup> | <i>smurf</i> <sup>KG07014</sup> / + | <i>nedd4</i> <sup>DG05310</sup> / + | <i>nedd4</i> <sup>T119FS</sup> / + | <i>hiw</i> <sup>BG02015</sup> / <i>hiw</i> <sup>EP1308</sup> |
|-------------------|-----------------|----------------------------|-------------------------------------|-------------------------------------|------------------------------------|--------------------------------------------------------------|
| adult % expected  | 58 <sup>a</sup> | 01                         | 84                                  | 80                                  | 78                                 | 61 <sup>b</sup>                                              |

At least 200 adults were scored for each cross.

a. *dpp*<sup>hr27</sup> haploinsufficiency is consistent with a previous report (Wharton et al. 1993).

b. This result is not statistically different from wild type.

Wharton K, Ray R, Gelbart W. 1993. An activity gradient of *dpp* is necessary for the specification of dorsal pattern in the *Drosophila* embryo. *Development* 117:807-822.

**Table S7. Domain comparison between fly Nedd4 and two human Nedd4 proteins.**

|      | <u>HsNedd4</u>                                                                                    | <u>HsNedd4L</u>                                                                                   |
|------|---------------------------------------------------------------------------------------------------|---------------------------------------------------------------------------------------------------|
| C2   | Length: 108<br>Id: 62/108 (57%)<br>Sim: 77/108 (71%)<br>Gap: 09/108 (08%)<br>Score: 294.5         | Length: 106<br>Id: 63/106 (59%)<br>Sim: 78/106 (74%)<br>Gap: 04/106 (04%)<br>Score: 312.5         |
| WW   | Length: 33<br>Id: 24/33 (73%)<br>Sim: 25/33 (76%)<br>Gap: 00/33 (00%)<br>Score: 135.0             | Length: 33<br>Id: 33/33 (100%)<br>Sim: 33/33 (100%)<br>Gap: 00/33 (00%)<br>Score: 187.0           |
| WW   | Length: 33<br>Id: 14/33 (42%)<br>Sim: 19/33 (58%)<br>Gap: 00/33 (00%)<br>Score: 82.0              | Length: 33<br>Id: 33/33 (100%)<br>Sim: 33/33 (100%)<br>Gap: 00/33 (00%)<br>Score: 189.0           |
| WW   | Length: 33<br>Id: 26/33 (79%)<br>Sim: 29/33 (88%)<br>Gap: 00/33 (00%)<br>Score: 162.0             | Length: 33<br>Id: 26/33 (79%)<br>Sim: 29/33 (88%)<br>Gap: 00/33 (00%)<br>Score: 163.0             |
| HECT | Length: 337<br>Id: 244/337 (72%)<br>Sim: 282/337 (84%)<br>Gap: 00/337 (00%)<br>Score: 1351.0      | Length: 337<br>Id: 238/337 (71%)<br>Sim: 283/337 (84%)<br>Gap: 00/337 (00%)<br>Score: 1328.0      |
| ALL  | Length: 1043<br>Id: 488/1043 (47%)<br>Sim: 606/1043 (58%)<br>Gap: 179/1043 (17%)<br>Score: 2299.5 | Length: 1079<br>Id: 492/1079 (46%)<br>Sim: 633/1079 (59%)<br>Gap: 176/1079 (16%)<br>Score: 2348.0 |

a - red as in Table S3

b - blue as in Table S3

**Table S8. Domain comparison between fly Dad and two human Smad proteins.**

|     | <u>HsSmad6</u>     | <u>HsSmad7</u>     |
|-----|--------------------|--------------------|
| MH1 | Length: 129        | Length: 146        |
|     | Id: 35/129 (27%)   | Id: 36/146 (25%)   |
|     | Sim: 53/129 (41%)  | Sim: 53/146 (36%)  |
|     | Gap: 33/129 (26%)  | Gap: 55/146 (38%)  |
|     | Score: 105.5       | Score: 89.5        |
| MH2 | Length: 174        | Length: 173        |
|     | Id: 71/174 (41%)   | Id: 66/173 (38%)   |
|     | Sim: 86/174 (49%)  | Sim: 94/173 (54%)  |
|     | Gap: 15/174 (09%)  | Gap: 12/173 (07%)  |
|     | Score: 302.0       | Score: 283.0       |
| ALL | Length: 622        | Length: 650        |
|     | Id: 171/622 (28%)  | Id: 138/650 (21%)  |
|     | Sim: 227/622 (37%) | Sim: 193/650 (30%) |
|     | Gap: 180/622 (29%) | Gap: 306/650 (47%) |
|     | Score: 449.0       | Score: 398.0       |

a - red as in Table S3 and S7

b - blue as in Table S3 and S7

## Fourteen Supplemental Figures

```
MmTIF1-δ_isoform1    MSPGLPVSIPSQPHCSTDERVEALAPTCSMCGRDLQAEGSRLLPCQHLLCKDCYQ 55
MmTIF1-δ_isoform3    -----
MmTIF1-δ_isoform2    -----
HsTIF1-δ current     -----

MmTIF1-δ_isoform1    GFMQELGHATRAYPGKLISCPGCQRVYLTRDVTEHIFLQCFSPVKPTMARNCSECKE 112
MmTIF1-δ_isoform2    -----MARNCSECKE 10
MmTIF1-δ_isoform3    -----MARNCSECKE 10
HsTIF1-δ current     -----MARNCSECKE 10
```

**Fig. S1. Alignment of human and mouse TIF1-δ/TRIM66 5' ends.** Three experimentally identified isoforms of mouse TIF1-δ/TRIM66 are shown: isoform1 NP\_001164383, isoform2 NP\_862901 and isoform3 NP\_001164384 (Khetchoumian et al., 2004). These are aligned with the current prediction for human TIF1-δ/TRIM66 (from the genomic scaffold of chromosome 11 corresponding to 11p15.4). Note that only mouse isoform1 contains the RING domain (Red) found in at least one isoform of all TIF1/TRIM family members and Bonus. Sequences identical in all TIF1-δ/TRIM66 isoforms are shown in green.

Khetchoumian K, Teletin M, Mark M, Lerouge T, Cerviño M, Oulad-Abdelghani M, Chambon P, Losson R. 2004. TIF1δ a novel HP1-interacting member of the TIF1 family expressed by elongating spermatids. *J Biol Chem.* 279:48329-48341.



A

```
Score      Expect          Method          Identities    Positives     Gaps
68.2 bits(165) 2e-08  Compositional matrix adjust  33/65(51%)  44/65(67%)  2/65(3%)
Features: 19994bp at 5' side of TIF1-δ/TRIM66

Query  4          GLPVSIPSQPHCSTDERVEALAPTCSMCGRDLQAEGSRLLPCQHLLCKDCYQGFMQELGH  63
      GLP++   Q HC   ++EA+  TCS+C +DL  GS LL CQHLL KDC+QG +QELG
Sbjct  8633537  GLPLA--GQKHCPKSGQMEAMVMTCSLCHQDLPGMGSHLLSCQHLLRKDCFQGLIQELGQ  8633364

Query  64          ATRAY  68
      +A+
Sbjct  8633363  IAKAH  8633349
```

B

```
Score      Expect          Method          Identities    Positives     Gaps
57.4 bits(137) 4e-05  Compositional matrix adjust  25/35(71%)  28/35(80%)  0/35(0%)
Features: TIF1-δ/TRIM66

Query  71          KLISCPGCQRVYLTRDVTEHIFLQCFSPVKPTMAR  105
      +LISCPGC+RVYLTRDVTEH FL C   +P MAR
Sbjct  8613451  ELISCPGCERVYLTRDVTEHFFLHCVPTEQPKMAR  8613347
```

**Fig. S2. Identification of the RING domain in human TIF1-δ/TRIM66.** Results of a TblastN query employing the N-terminal region of mouse TIF1-δ/TRIM66 isoform1 against the human RefSeq Genomic database. A) Region of significant similarity is identified roughly 20kb upstream of the current translation start codon. B) Region of significant similarity is identified immediately upstream and in-frame with the current translation start codon (underlined M).

A

```

MmTIF1-δ isoform1  -----MSPGLPVSIPSQPHCSTDERVEALAPTCSMCGRDLQAEGRLLPCQHLLCKDCYQ  55
MmTIF1-δ isoform3  -----
MmTIF1-δ isoform2  -----
HsTIF1-δ current   -----
HsTIF1-δ_new       MAVDMGMSFMGLPLAGQKHCPKSGQMEAMVMTCSLCHQDLPGMGSHLLSCQHLLSKDCFQ  60

MmTIF1-δ isoform1  GFMQELGHATRAYS---GKLISCPGCQRVYLTRDVTEHIFLQCFSPVKPTMARNCSECKE  112
MmTIF1-δ isoform2  -----MARNCSECKE  10
MmTIF1-δ isoform3  -----MARNCSECKE  10
HsTIF1-δ current   -----MARNCSECKE  10
HsTIF1-δ_new       GLIQELGQIAKAHETVADELISCPGCERVYLTRDVTEHFFLHCVPTQPKMARNCSECKE  120

```

B

| Score                                         | Expect | Method                                                       | Identities | Positives  | Gaps     |
|-----------------------------------------------|--------|--------------------------------------------------------------|------------|------------|----------|
| 160 bits(404)                                 | 4e-37  | Compositional matrix adjust                                  | 76/78(97%) | 76/78(97%) | 0/78(0%) |
| Features: 20167bp at 5' side of TIF1-δ/TRIM66 |        |                                                              |            |            |          |
| Query 1                                       |        | MAVDMGMSFMGLPLAGQKHCPKSGQMEAMVMTCSLCHQDLPGMGSHLLSCQHLLSKDCFQ |            |            | 60       |
| Sbjct 4346862                                 |        | MAVDMGMSFMGLPLAGQKHCPKSGQMEAMVMTCSLCHQDLPGMG HLLSCQHLL KDCFQ |            |            | 4346683  |
| Query 61                                      |        | GLIQELGQIAKAHETVAD 78                                        |            |            |          |
| Sbjct 4346682                                 |        | GLIQELGQIAKAHETVAD 4346629                                   |            |            |          |

  

| Score                   | Expect | Method                                              | Identities  | Positives   | Gaps     |
|-------------------------|--------|-----------------------------------------------------|-------------|-------------|----------|
| 79.3 bits(194)          | 1e-12  | Compositional matrix adjust                         | 35/35(100%) | 35/35(100%) | 0/35(0%) |
| Features: TIF1-δ/TRIM66 |        |                                                     |             |             |          |
| Query 79                |        | ELISCPGCERVYLTRDVTEHFFLHCVPTQPKMAR 113              |             |             |          |
| Sbjct 4326558           |        | ELISCPGCERVYLTRDVTEHFFLHCVPTQPK <u>M</u> AR 4326454 |             |             |          |

**Fig. S3. Alignment of the new and current human 5' ends with mouse TIF1-δ/TRIM66.** A)

The new open reading frame created by connecting the distant upstream region, the immediately upstream region and the current sequence of human TIF1-δ/TRIM66 is shown. The presence of a well-defined RING domain in the new sequence that is 60% identical to the RING domain in mouse TIF1-δ/TRIM66 isoform1 is indicated (red). Sequences identical in all TIF1-δ/TRIM66 isoforms are shown in green. B) The 5' extension of the human TIF1-δ/TRIM66 open reading frame is 98% identical to sequences encoded by two regions of the *Pan troglodytes* chromosome 11 genomic scaffold (current translation start codon for human TIF1-δ/TRIM66 is the underlined M).

```

8693567                                     ATGGCTGTGGACATGGGC
                                                M A V D M G
ATGAGCTTTATGGGGCTGCCACTAGCTGGCCAGAAACTGCCCTAAGAGTGGACAGATG
M S F M G L P L A G Q K H C P K S G Q M
GAGGCCATGGTAATGACCTGCTCATTGTGCCATCAGGACCTGCCAGGTATGGGCTCTCAT
E A M V M T C S L C H Q D L P G M G S H
CTCCTATCCTGCCAGCATTGTGCTCAGTAAGGACTGCTTCCAGGGCTTGATACAGGAGCTA
L L S C Q H L L S K D C F Q G L I Q E L
GGGCAGATTGCCAAGGCTCATGAGACTGTTGCAGATGGTAAGTACAAAGGCCACCACAAGT
G Q I A K A H E T V A D 8693332
TCACCTCCCCTACATAACAGGTCTCTCCTGTTTCATAGGAAGTGAATTTTGGGTGTAG
//.....//
TTTGGCACACATGGGTATTGCCATGTATCTTGGTGTGTATTAGAAAGCCTTATGTCC
AGGCCTTAGTTATAATCAGCCATGTTGCCCTGACTCTGCTATCTTTCTTCTTGCACAGA
-19      8673452  E
GCTCATCTCCTGTCTGGGTGTGAACGAGTATATCTTACCAGGGATGTAAGTGAACATTT
L I S C P G C E R V Y L T R D V T E H F
TTTCTGCATTGTGTTCTTACTGAGCAACCCAAGATGGCCAGGGTAAGTCAGGACAAGGA
F L H C V P T E Q P K M A R V S Q D K E

```

**Fig. S4. Locations of new initiator methionine and splice sites for human TIF1- $\delta$ /TRIM66.**

Genomic sequence derived from GRCh37.p10 the primary assembly of human chromosome 11 is shown (NC\_000011.9). Similarity to mouse TIF1- $\delta$ /TRIM66 isoform1 identifies the proposed new methionine at 8693567. An EST (TESTI4024751) identifies a splice donor site at 8693331 and a splice acceptor site at 8673452. The 5' and 3' ends of the intron are highlighted in yellow and the intervening 19880 nucleotides are shown as dots between pairs of forward slashes. A potential branch site at -19 from the splice acceptor site is underlined and italicized. The upstream extension of the current human TIF1- $\delta$ /TRIM66 open reading frame is in red with the corresponding nucleotide sequence underlined. The initiator methionine of the current human TIF1- $\delta$ /TRIM66 open reading frame is in bold.



**E**  
NJ  
CeBET-2  
Outgroup

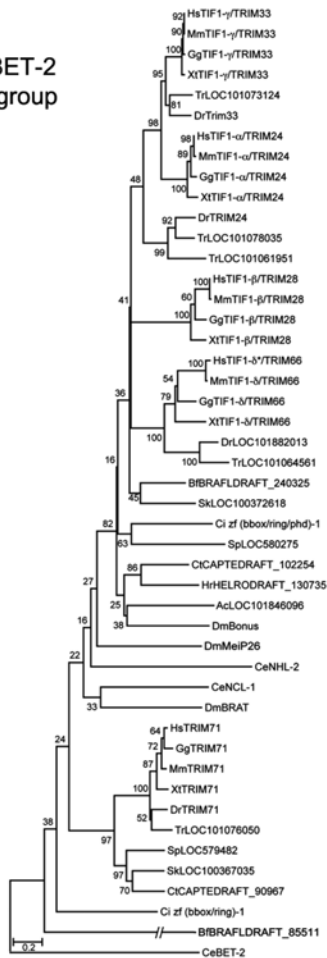

**F**  
ML  
CeBET-2  
Outgroup

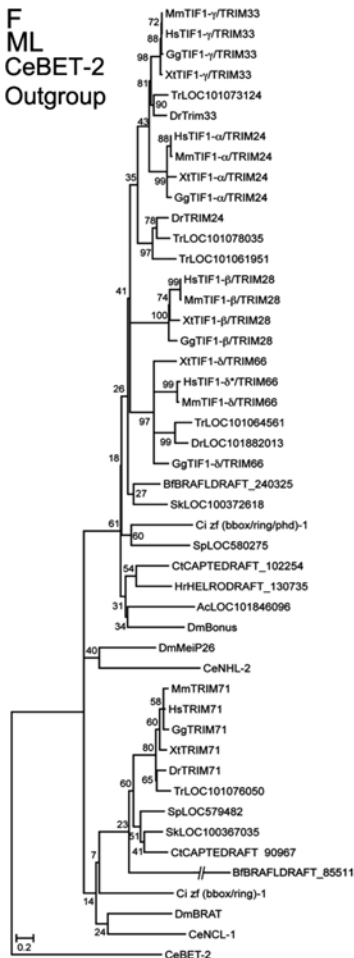

**G**  
NJ  
HsTrim37  
Outgroup

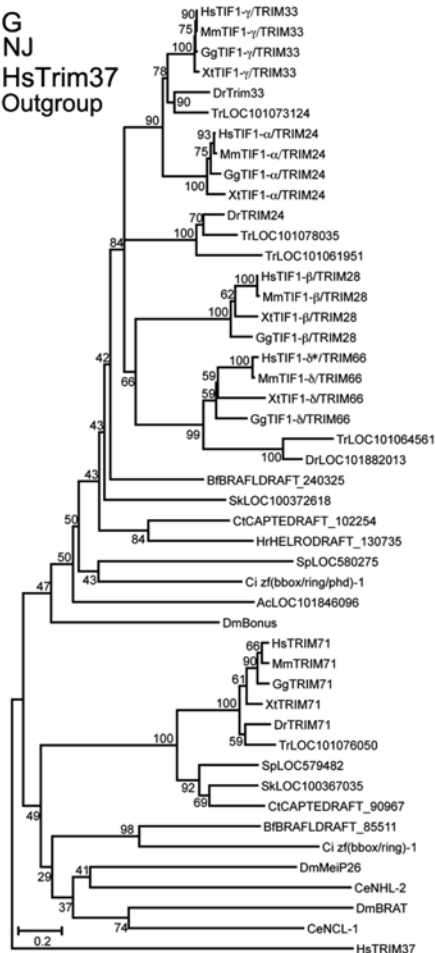

**H**  
ML  
HsTrim37  
Outgroup

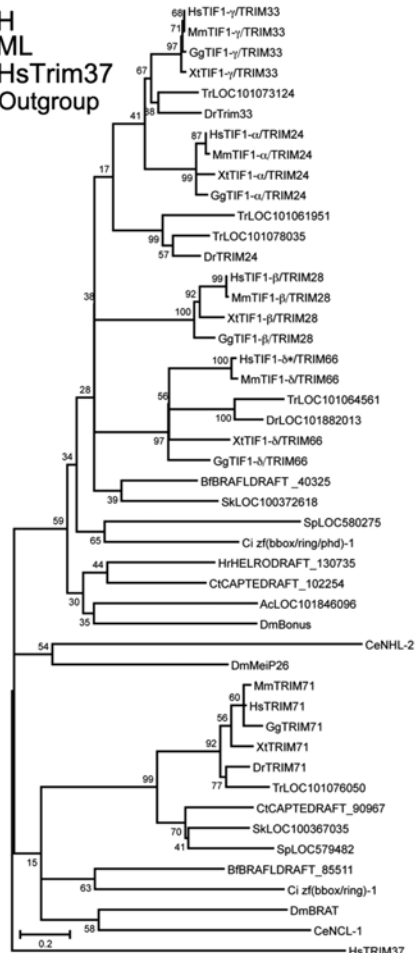

**Fig. S5. Evolutionary relationships within the Bonus-Tif1- $\gamma$ /TRIM33 subfamily are topologically consistent in multiple trees.** A) Neighbor Joining (NJ), B) Maximum Likelihood (ML) and C) Bayesian trees of eleven human (Hs), fly (Dm) and nematode (Ce) TRIM family sequences from Table S1 related to Bonus. HsTRIM71 was chosen to anchor the non-Bonus fly and nematode sequences into a single subfamily. HsTRIM37 was chosen as the outgroup based Sardiello et al. (2008) indicating that HsTRIM37 did not cluster with any other human TRIM proteins. The alignment contained 517 informative positions. A scale bar showing amino acid substitutions per site is present. Bootstrap values (NJ tree and ML tree) above 40% or posterior probabilities above 0.5 (Bayesian tree) are shown. Bootstrap values above 70% and posterior probabilities above 0.95 are considered statistically significant. Each tree contains the same two distinct subfamilies. Within one subfamily Bonus is consistently the most distant sequence, either TIF1- $\beta$ /TRIM28 or TIF1- $\delta$ /TRIM61 are the oldest vertebrate and TIF1- $\gamma$ /TRIM33 is the youngest vertebrate sequence. D) Expanded Bayesian tree containing all 47 sequences in Table S1 derived from an alignment with 154 informative positions. The same two statistically supported subfamilies are visible. The topology of the Bonus-TIF1- $\gamma$ /TRIM33 subfamily shows a slightly different topology than the other trees with Bonus midway between the four vertebrate sequences rather than as an outlier. E, F) Expanded NJ and ML trees employing CeBET-2 as an outgroup derived from an alignment with 173 informative positions and displaying all bootstrap values. G,H) Expanded NJ and ML trees employing HsTRIM37 as an outgroup derived from an alignment with 154 informative positions and displaying all bootstrap values. Each of the four large trees contains the same two distinct subfamilies with occasional non-significant outliers (e.g. CeNHL-2/DmMeiP26 in panel H). In the TIF1- $\gamma$ /TRIM33 subfamily Bonus consistently maps as the most divergent sequence. Based on topology and branch lengths, either TIF1- $\beta$ /TRIM28 or TIF1- $\delta$ /TRIM61 is the oldest and TIF1- $\gamma$ /TRIM33 the youngest vertebrate sequence in this subfamily.

Sardiello M, Cairo S, Fontanella B, Ballabio A, Meroni G. 2008. Genomic analysis of the TRIM family reveals two groups with distinct evolutionary properties. *BMC Evol Biol.* 8:225

**A**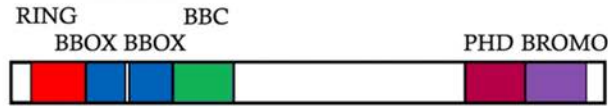**B**

|                  |     |                                                              |
|------------------|-----|--------------------------------------------------------------|
| DmBonus          | 1   | -----MMDMLEQLKNDFLPLIAGKQEQQLDAVPTDALPQMS                    |
| HsTIF1-β/TRIM28  | 1   | -----MAASAAAASAAAASASG                                       |
| HsTIF1-δ*/TRIM66 | 1   | -----MAVDMGMSFMG                                             |
| HsTIF1-α/TRIM24  | 1   | -----MEVAVEKAVAAAASAA                                        |
| HsTIF1-γ/TRIM33  | 1   | MAENKGGGEAESGGGSGSAPVTAGAAGPAAQEAEPPLTAVLVEEEEEGGRAGAEAGAA   |
|                  |     |                                                              |
| DmBonus          | 37  | TPNTASGAPTTSSLSLSSLSLNPDCSAAEKRSSESNS-----ASAKF              |
| HsTIF1-β/TRIM28  | 19  | SPGPGEGSAGEKRSTAPSAASASASAAASSPAGGG-----EALE                 |
| HsTIF1-δ*/TRIM66 | 12  | LPLAGQKHCPKSGQMEA-----                                       |
| HsTIF1-α/TRIM24  | 19  | AS--GGPSAAPSGENEABSROCPDSE-----GGEAAR-----LN                 |
| HsTIF1-γ/TRIM33  | 61  | GEDDGGVAASSSGSAQAASPPASVGLVAGGAVSTPAPAPASAPAGPSAGPPPAPPAS    |
|                  |     |                                                              |
| DmBonus          | 79  | TLFKVVYAAALGND--RKKLECLVAQAQVSTKFSERDRLI-----P               |
| HsTIF1-β/TRIM28  | 61  | LLHHSVCRERLRPER--EQLLPLCLSAASALGPAAPAAANS-----               |
| HsTIF1-δ*/TRIM66 | 29  | MVNTCSLCHQDPLPGMG---SHLLSCALLSKDFQGLIQEAGQIAK-----           |
| HsTIF1-α/TRIM24  | 52  | LLDTCVVCCHQIQER---APKLLPLCLHSPQRCLPAPQRYMLPAMLGSAAETPPVPAP   |
| HsTIF1-γ/TRIM33  | 121 | LLDTCVVCQSLQRRREAEPKLLPLCLHSPRLRLPEPERQLSVPI-----            |
|                  |     |                                                              |
| DmBonus          | 124 | LIHCPVCDNASQDEFIVDNOFLIEQCTAGDSCDGVGTLGLIGEGQKSAASAIOEESCSE  |
| HsTIF1-β/TRIM28  | 104 | -----LDGGAAGDGTVDGCPVCKQOCFSKDIVENYFMRDEGSKAAADAQDANCTSCED   |
| HsTIF1-δ*/TRIM66 | 72  | -----AHETVADELLSCPSGERVYLTRDVTSEHFLHCVPTQPKMARN-----CEEK     |
| HsTIF1-α/TRIM24  | 109 | GSPVSSSPFATVGHTRCPVGSQESAEERHLLDNFFVKDTEVPSSIVEKSNQVCTSCED   |
| HsTIF1-γ/TRIM33  | 167 | -----GSNGDIQVGVIREPVCROBCRQIDLVNDNVFKDTEAPSSDEKSEVCTSCED     |
|                  |     |                                                              |
| DmBonus          | 184 | GAVATSMCVDSSEETDRCQEAHQRIKIKPKDHTIKPKDEANNEQLAGAGVHLHMQEHL   |
| HsTIF1-β/TRIM28  | 159 | NAPATSMCVEGSEPCCTCNEAHRVVKTKDHTWRSTGPAK-----SRDGRFTVNCNHL    |
| HsTIF1-δ*/TRIM66 | 121 | KRAAHILCTYNNRLCSACTEHRHSPVPGGPFPPRAOKSSP--GVNGGPEFTVYCPAH    |
| HsTIF1-α/TRIM24  | 169 | NABANGMCVEQVEWLKTCRAHQRVKTKDHTVQKKEVSP--EAVGVTSQRVPCFPH      |
| HsTIF1-γ/TRIM33  | 223 | NASEVGCVEGGEWLKTCRAHQRVKTKDHTLRKKEVVS---ESVGASQRVPCFPH       |
|                  |     |                                                              |
| DmBonus          | 244 | FOEKLSLFCETCDRLTCRDCQLSHEHHEKRAHEIATESRQAESTLMEENYKFLSS      |
| HsTIF1-β/TRIM28  | 213 | KHEPLVLFCEICDTCTCRDCOLNAHKEHQYQFLEDVVRNORKLALMLKHEGKATQK     |
| HsTIF1-δ*/TRIM66 | 179 | TOPVVKLFCETCDMLTCHSLDHEHKEHRCRHEEVLQNMMLLGGTQVHAKKSSQK       |
| HsTIF1-α/TRIM24  | 227 | KKQQLKLCETCDRLTCRDCQLLHHEKERYQFEEAFQNGVETLQVLMEMTKYKFK       |
| HsTIF1-γ/TRIM33  | 280 | KQKQLKLCETCDRLTCRDCQLLHHEKERYQFEEAFQNGALNLAALMLKLNYPHF       |
|                  |     |                                                              |
| DmBonus          | 304 | ATRVLDROQLHKKRDLIKKITAMAKTIEVNYNGKQEMREINVCDSLKVLEKK         |
| HsTIF1-β/TRIM28  | 273 | ITREIRSSIRCVSLVKKVQVVKKAIQMKENKGVVLENDAAQVTEGOQEELERFH       |
| HsTIF1-δ*/TRIM66 | 239 | IKQIEDRIFEVKQHHEVVEQIKPAKVLMMENKQNGLEEELEGFTNKKRKLQQL        |
| HsTIF1-α/TRIM24  | 287 | LNQIQNRHIEVNONKQVEIKAIFTLMEENKGRALHOLESAKDRMRLQQQ            |
| HsTIF1-γ/TRIM33  | 340 | AATQQRHKEVNTTKIVEIKAIFTLMEENKGRKSAQQLENVTKLQMKLQQQ           |
|                  |     |                                                              |
| DmBonus          | 364 | ETVQLSDTTHCIDFMNALKKSGDFALLSKKSLVRHLOKLCORADIPNEIIPVRIQ      |
| HsTIF1-β/TRIM28  | 333 | WNTTKLQHQHELRFAASWAEESDNTALLSKLALYFQLALAMIVDPV-EPHG-EMK      |
| HsTIF1-δ*/TRIM66 | 299 | QVMMVNIQFQEHVQNFILWANCSSVPEELSKELIVFQQLLETSCNTD-PGSPWSIR     |
| HsTIF1-α/TRIM24  | 347 | GEAGLSQDEEHVHFSKWAASGSSTALLSKLITTRALLARCDAS-PVTNNTIQ         |
| HsTIF1-γ/TRIM33  | 400 | EDTGLSDEQVHVNETFWAASGSSTALLSKLITTEOALLARCPDV-PAANGAIR        |
|                  |     |                                                              |
| DmBonus          | 424 | VQLNQVSDLOKVISQLGHIIVDGKPYPTPSP-----                         |
| HsTIF1-β/TRIM28  | 391 | FQWDLN-AWTKSAEAFGKIVARP-----                                 |
| HsTIF1-δ*/TRIM66 | 358 | FTWEPN-FWTKQIASLGCITTEGGQMSRADAPAYGGLQGSSPFYQSHQSPVAQQEALS// |
| HsTIF1-α/TRIM24  | 406 | FHCDPS-FWAGNIINLGSFVIEDKESQ-----                             |
| HsTIF1-γ/TRIM33  | 459 | FHCDPT-FWAKNVVNLGNLVIESK-----                                |
|                  |     |                                                              |
| DmBonus          | 456 | -----NGTEQEQHPFRCPSPMAPPLRPLPPGMEAGLSPNG                     |
| HsTIF1-β/TRIM28  | 414 | -----GTNSTGPAP-----                                          |
| HsTIF1-δ*/TRIM66 | 477 | LPREKELACSPHPKLLQPWLETQPEVEQUESTSQRLLGQLTSQPVCIVPPQDVQGAHAQ  |
| HsTIF1-α/TRIM24  | 432 | -----PQMEKQNPVVEQNSQPPSGLSSNQLSKFPTQISLAQ                    |
| HsTIF1-γ/TRIM33  | 482 | -----PAGYTPNVVVGQVEPPG---TNHISKTEQDNLAQ                      |
|                  |     |                                                              |
| DmBonus          | 494 | PPVNFQFQNGPPLYSNAAQQQFNLLSMSRSFPDGGSGKVFVGGMPFVGMQRHGQPHVSSS |
| HsTIF1-β/TRIM28  | 423 | -----MAPFRAPCPLSKQSGSSQPP-----                               |
| HsTIF1-δ*/TRIM66 | 537 | PTLQTPSIQVQFGEHOKLKLSHFQQPQQQLPPPPPLPFPPPPLPPPPQPHFPLPSSQ    |
| HsTIF1-α/TRIM24  | 468 | LRLOHMQQQVMAQVQQ-----VQRRPAPVG-LPNPRMQGPIQQPSISHQPPPERLINFO  |
| HsTIF1-γ/TRIM33  | 514 | LRLOHMQQQVMAQVHQQLQQMRMQQPPAPVPTTTTTTQQVPRQAAPQMLQQQPERLSVQ  |
|                  |     |                                                              |
| DmBonus          | 554 | THPQN-----MDISLGLLNQAACSPVAH                                 |
| HsTIF1-β/TRIM28  | 443 | -----                                                        |
| HsTIF1-δ*/TRIM66 | 597 | HLASSQHESPPGPACSONMDIMHKKFELEEMQKLELLLQAQQPSLQLSQTKSPQHLQQT  |
| HsTIF1-α/TRIM24  | 521 | NHSP-----RPNGPVLPHPQQLR                                      |
| HsTIF1-γ/TRIM33  | 574 | TMQ-----RGNMCGAFAHMR                                         |



|                  |      |                                                                                                                                                                                                                                                                                                                             |
|------------------|------|-----------------------------------------------------------------------------------------------------------------------------------------------------------------------------------------------------------------------------------------------------------------------------------------------------------------------------|
| DmBonus          | 579  | MAFN <b>G</b> PPSY <b>P</b> GG <b>P</b> Q <b>G</b> AP <b>A</b> PA <b>H</b> Q <b>F</b> M <b>G</b> P <b>M</b> R <b>H</b> F <b>M</b> P <b>C</b> Q <b>O</b> G <b>F</b> S <b>O</b> GG <b>G</b> P <b>G</b> G <b>C</b> PR <b>D</b> AN <b>F</b> M <b>N</b> SN <b>---</b>                                                            |
| HsTIF1-β/TRIM28  | 443  | -----MEV <b>O</b> EGY <b>G</b> F <b>G</b> S <b>C</b> DD <b>P</b> Y <b>S</b> SA <b>E</b> PH <b>V</b> S <b>C</b> V <b>K</b> R <b>S</b> R <b>S</b> GE <b>G</b> E <b>---</b>                                                                                                                                                    |
| HsTIF1-δ*/TRIM66 | 657  | LV <b>G</b> Q <b>I</b> NY <b>I</b> VR <b>Q</b> PA <b>P</b> V <b>Q</b> S <b>S</b> QE <b>E</b> T <b>L</b> Q <b>A</b> T <b>D</b> EP <b>P</b> AS <b>O</b> G <b>S</b> KE <b>A</b> L <b>P</b> L <b>D</b> K <b>N</b> T <b>A</b> L <b>P</b> L <b>O</b> AS <b>G</b> E <b>E</b> T <b>P</b> L <b>---</b>                               |
| HsTIF1-α/TRIM24  | 540  | Y <b>P</b> PN <b>Q</b> NI <b>P</b> R <b>Q</b> AI <b>K</b> PN <b>L</b> MA <b>F</b> LA <b>Q</b> Q <b>A</b> I <b>K</b> Q <b>W</b> IS <b>S</b> Q <b>G</b> --- <b>H</b> P <b>S</b> T <b>T</b> N <b>S</b> <b>S</b> S <b>T</b> P <b>S</b> S <b>P</b> T <b>I</b> T <b>S</b> <b>---</b>                                              |
| HsTIF1-γ/TRIM33  | 592  | LA <b>Q</b> NA <b>A</b> RI <b>P</b> GI <b>P</b> R <b>H</b> SG <b>P</b> Y <b>S</b> MM <b>Q</b> PH <b>L</b> R <b>Q</b> HS <b>N</b> P <b>G</b> H <b>A</b> GP <b>P</b> VV <b>S</b> V <b>H</b> N <b>I</b> T <b>I</b> N <b>I</b> P <b>S</b> P <b>T</b> TA <b>I</b> <b>---</b>                                                     |
| DmBonus          | 637  | -----ARFQSOY                                                                                                                                                                                                                                                                                                                |
| HsTIF1-β/TRIM28  | 478  | -----VSGL                                                                                                                                                                                                                                                                                                                   |
| HsTIF1-δ*/TRIM66 | 717  | SV <b>P</b> PP <b>V</b> DS <b>T</b> IQ <b>H</b> SS <b>P</b> NV <b>V</b> R <b>K</b> H <b>S</b> T <b>S</b> LS <b>I</b> M <b>G</b> F <b>S</b> NT <b>L</b> EM <b>E</b> LS <b>S</b> TR <b>L</b> ER <b>L</b> EP <b>L</b> EQ <b>I</b> Q <b>S</b> V <b>S</b> N <b>L</b> T <b>A</b> CA <b>---</b>                                    |
| HsTIF1-α/TRIM24  | 596  | -----AAGY                                                                                                                                                                                                                                                                                                                   |
| HsTIF1-γ/TRIM33  | 650  | -----MANA                                                                                                                                                                                                                                                                                                                   |
| DmBonus          | 644  | QR <b>M</b> AN <b>H</b> AQ <b>Q</b> AAAA <b>A</b> MA <b>G</b> A <b>G</b> GG <b>G</b> Q <b>E</b> SP <b>G</b> AL <b>Q</b> R <b>P</b> Q <b>M</b> SN <b>P</b> <b>T</b> Q <b>N</b> V <b>S</b> AM <b>Q</b> NS <b>I</b> G <b>F</b> H <b>G</b> S <b>Q</b> A <b>---</b>                                                              |
| HsTIF1-β/TRIM28  | 482  | MR <b>K</b> V <b>P</b> RV <b>S</b> LR <b>E</b> LD <b>L</b> DL <b>T</b> AD <b>S</b> Q <b>---</b> -----PP <b>V</b> F <b>K</b> L <b>F</b> PG <b>S</b> TE <b>---</b>                                                                                                                                                            |
| HsTIF1-δ*/TRIM66 | 777  | Q <b>A</b> VP <b>S</b> LL <b>S</b> AP <b>P</b> K <b>V</b> SS <b>I</b> TS <b>V</b> Q <b>N</b> Q <b>A</b> MP <b>S</b> LT <b>T</b> SH <b>L</b> Q <b>T</b> VP <b>S</b> LV <b>H</b> ST <b>F</b> OS <b>M</b> PN <b>L</b> IS <b>D</b> S <b>P</b> Q <b>A</b> MA <b>---</b>                                                          |
| HsTIF1-α/TRIM24  | 600  | D <b>G</b> --K <b>A</b> FG <b>S</b> PM <b>I</b> DL <b>S</b> SP <b>V</b> GG <b>S</b> YN <b>L</b> PS <b>L</b> PD <b>I</b> ----DC <b>S</b> S <b>I</b> M <b>D</b> NI <b>V</b> R <b>K</b> DT <b>N</b> I <b>D</b> H <b>G</b> Q <b>R</b> PR <b>---</b>                                                                             |
| HsTIF1-γ/TRIM33  | 654  | NR <b>G</b> PT <b>S</b> PS <b>V</b> TA <b>I</b> EL <b>I</b> PS <b>V</b> T <b>N</b> PE <b>N</b> L <b>S</b> LE <b>D</b> IP <b>P</b> IQ <b>L</b> E <b>D</b> AG <b>S</b> SS <b>I</b> DN <b>L</b> SL <b>R</b> Y <b>I</b> SG <b>S</b> HL <b>P</b> Q <b>P</b> Q <b>---</b>                                                         |
| DmBonus          | 704  | GF <b>N</b> T <b>G</b> PP <b>T</b> S <b>P</b> Q <b>E</b> GG <b>G</b> M <b>H</b> SL <b>A</b> K <b>W</b> H <b>I</b> P <b>Q</b> SA <b>Q</b> SN <b>M</b> CS <b>Q</b> Q <b>G</b> PL <b>L</b> PF <b>A</b> NG <b>R</b> OT <b>S</b> EN <b>F</b> K <b>I</b> SL <b>K</b> <b>---</b>                                                   |
| HsTIF1-β/TRIM28  | 516  | D <b>Y</b> N <b>L</b> IV <b>I</b> ER <b>G</b> AAAA <b>T</b> Q <b>P</b> G <b>---</b> ----- <b>H</b> A <b>P</b> AC <b>T</b> P <b>C</b> AP <b>P</b> LAG <b>---</b>                                                                                                                                                             |
| HsTIF1-δ*/TRIM66 | 837  | SL <b>A</b> SD <b>H</b> P <b>Q</b> AG <b>S</b> MS <b>G</b> H <b>T</b> Q <b>A</b> VP <b>S</b> L <b>A</b> T <b>C</b> PL <b>Q</b> S <b>I</b> PP <b>V</b> SD <b>M</b> Q <b>P</b> ET <b>G</b> SS <b>S</b> SS <b>G</b> R <b>T</b> SG <b>S</b> LC <b>P</b> RD <b>G</b> <b>---</b>                                                  |
| HsTIF1-α/TRIM24  | 653  | PS <b>N</b> RT <b>V</b> Q <b>S</b> PN <b>S</b> Y <b>F</b> SP <b>G</b> L <b>A</b> GP <b>V</b> T <b>M</b> TS <b>V</b> H <b>P</b> PI <b>R</b> SP <b>S</b> ASS <b>V</b> GR <b>G</b> SS <b>G</b> SS <b>S</b> K <b>P</b> AG <b>A</b> D <b>S</b> TH <b>K</b> <b>---</b>                                                            |
| HsTIF1-γ/TRIM33  | 714  | T <b>S</b> TM <b>N</b> P <b>-</b> SP <b>G</b> PS <b>A</b> L <b>SP</b> SS <b>G</b> --- <b>L</b> SN <b>S</b> HT <b>P</b> VR <b>PP</b> ST <b>S</b> ST <b>G</b> SR <b>G</b> SC <b>G</b> SS <b>C</b> R <b>T</b> A <b>E</b> K <b>T</b> SL <b>S</b> <b>---</b>                                                                     |
| DmBonus          | 764  | SP <b>N</b> T <b>L</b> KN <b>S</b> TP <b>P</b> SL <b>G</b> GG <b>G</b> AG <b>H</b> Q <b>H</b> GN <b>G</b> SS <b>S</b> A <b>Q</b> L <b>N</b> AA <b>L</b> GL <b>G</b> PA <b>V</b> S <b>I</b> LS <b>N</b> V <b>T</b> S <b>---</b>                                                                                              |
| HsTIF1-β/TRIM28  | 550  | -----MA <b>I</b> V <b>K</b> EE <b>E</b> <b>---</b>                                                                                                                                                                                                                                                                          |
| HsTIF1-δ*/TRIM66 | 897  | AD <b>P</b> SL <b>E</b> N <b>A</b> L <b>C</b> K <b>V</b> LE <b>B</b> PN <b>L</b> SV <b>K</b> K <b>P</b> PL <b>A</b> P <b>V</b> V <b>S</b> T <b>S</b> T <b>A</b> L <b>Q</b> Y <b>Q</b> N <b>P</b> KE <b>C</b> EN <b>F</b> E <b>Q</b> A <b>L</b> E <b>D</b> A <b>K</b> E <b>---</b>                                           |
| HsTIF1-α/TRIM24  | 712  | -----VP <b>V</b> ML <b>E</b> P <b>I</b> R <b>I</b> K <b>Q</b> EN <b>S</b> GP <b>P</b> EN <b>Y</b> DF <b>P</b> V <b>V</b> IV <b>K</b> Q <b>E</b> DE <b>E</b> SR <b>---</b>                                                                                                                                                   |
| HsTIF1-γ/TRIM33  | 768  | -----FK <b>S</b> D <b>Q</b> Y <b>K</b> V <b>K</b> Q <b>E</b> PG <b>T</b> E <b>D</b> E <b>I</b> CS <b>F</b> SG <b>V</b> K <b>Q</b> E <b>K</b> T <b>E</b> D <b>G</b> RR <b>S</b> AC <b>M</b> <b>---</b>                                                                                                                       |
| DmBonus          | 815  | -----T <b>P</b> K <b>T</b> PS <b>P</b> ST <b>H</b> ENT <b>K</b> DF <b>T</b> E <b>P</b> ID <b>K</b> <b>---</b>                                                                                                                                                                                                               |
| HsTIF1-β/TRIM28  | 558  | -----TE <b>A</b> A <b>G</b> AP <b>P</b> T <b>A</b> T <b>---</b>                                                                                                                                                                                                                                                             |
| HsTIF1-δ*/TRIM66 | 957  | N <b>Q</b> S <b>I</b> RA <b>F</b> NS <b>E</b> H <b>K</b> IP <b>Y</b> VR <b>L</b> ER <b>L</b> K <b>I</b> CA <b>S</b> SG <b>E</b> MP <b>V</b> F <b>K</b> LP <b>K</b> ND <b>Q</b> D <b>G</b> S <b>F</b> LL <b>I</b> EC <b>G</b> T <b>E</b> SS <b>M</b> <b>---</b>                                                              |
| HsTIF1-α/TRIM24  | 750  | -----P <b>N</b> ANY <b>P</b> RS <b>I</b> L <b>T</b> SL <b>L</b> NS <b>S</b> Q <b>S</b> <b>---</b>                                                                                                                                                                                                                           |
| HsTIF1-γ/TRIM33  | 807  | -----L <b>S</b> PE <b>S</b> SL <b>T</b> PP <b>L</b> ST <b>N</b> L <b>H</b> E <b>S</b> LD <b>A</b> L <b>---</b>                                                                                                                                                                                                              |
| DmBonus          | 838  | VR <b>D</b> S <b>I</b> ND <b>L</b> I <b>A</b> T <b>I</b> A <b>K</b> LD <b>S</b> NG <b>V</b> Q <b>L</b> PE <b>G</b> R <b>T</b> K <b>L</b> TS <b>P</b> Q <b>V</b> H <b>S</b> T <b>L</b> DS <b>N</b> ----T <b>Q</b> E <b>V</b> N <b>N</b> K <b>N</b> E <b>Q</b> K <b>D</b> <b>---</b>                                          |
| HsTIF1-β/TRIM28  | 570  | EG <b>P</b> E <b>K</b> P <b>V</b> L <b>M</b> AL <b>E</b> GP <b>A</b> EG <b>P</b> RI <b>A</b> SP <b>S</b> GS <b>T</b> SS <b>G</b> L <b>V</b> V <b>A</b> PE <b>G</b> -----TS <b>A</b> P <b>G</b> GG <b>P</b> GT <b>L</b> <b>---</b>                                                                                           |
| HsTIF1-δ*/TRIM66 | 1017 | SI <b>K</b> V <b>S</b> Q <b>D</b> R <b>L</b> SE <b>A</b> T <b>Q</b> AP <b>L</b> E <b>G</b> R <b>K</b> V <b>T</b> VS <b>L</b> AG <b>R</b> PP <b>E</b> VE <b>G</b> TS <b>P</b> EE <b>H</b> R <b>L</b> I <b>P</b> RT <b>P</b> CA <b>K</b> K <b>G</b> PP <b>A</b> P <b>---</b>                                                  |
| HsTIF1-α/TRIM24  | 772  | T <b>S</b> EE <b>V</b> L <b>R</b> SD <b>A</b> PD <b>S</b> T <b>G</b> D <b>Q</b> GL <b>E</b> Q <b>D</b> NS <b>N</b> G <b>K</b> SE <b>W</b> L <b>P</b> S <b>Q</b> K <b>S</b> P <b>---</b> -----L <b>H</b> V <b>E</b> T <b>R</b> - <b>K</b> E <b>D</b> <b>---</b>                                                              |
| HsTIF1-γ/TRIM33  | 832  | AS <b>L</b> EN <b>H</b> V <b>K</b> LE <b>P</b> AD <b>M</b> NE <b>S</b> CK <b>Q</b> SG <b>L</b> SS <b>L</b> V <b>N</b> G <b>K</b> SP <b>I</b> RS <b>L</b> M <b>H</b> RS <b>A</b> -----R <b>I</b> EG <b>D</b> GN <b>N</b> K <b>D</b> <b>---</b>                                                                               |
| DmBonus          | 894  | DP <b>N</b> ED <b>W</b> CA <b>V</b> C <b>Q</b> NG <b>G</b> LL <b>C</b> CE <b>K</b> CP <b>K</b> V <b>F</b> HL <b>S</b> CH <b>V</b> PT <b>L</b> LS <b>F</b> ---SG <b>E</b> W <b>I</b> C <b>T</b> F <b>C</b> R <b>D</b> L <b>G</b> K <b>P</b> E <b>V</b> E <b>Y</b> <b>---</b>                                                 |
| HsTIF1-β/TRIM28  | 622  | DD <b>S</b> AT <b>I</b> CR <b>V</b> CK <b>K</b> PG <b>L</b> W <b>C</b> N <b>Q</b> E <b>F</b> CF <b>H</b> LD <b>C</b> H <b>P</b> AL <b>O</b> D <b>V</b> F---GE <b>W</b> S <b>C</b> SL <b>CH</b> V <b>L</b> P <b>D</b> L <b>K</b> E <b>E</b> D <b>---</b>                                                                     |
| HsTIF1-δ*/TRIM66 | 1077 | I <b>E</b> N <b>E</b> D <b>W</b> CA <b>V</b> CL <b>N</b> GG <b>E</b> LL <b>C</b> CE <b>K</b> CP <b>K</b> V <b>F</b> HL <b>S</b> CH <b>V</b> P <b>A</b> LL <b>S</b> F---GG <b>E</b> W <b>V</b> CT <b>L</b> CS <b>L</b> T <b>O</b> P <b>E</b> ME <b>Y</b> <b>---</b>                                                          |
| HsTIF1-α/TRIM24  | 823  | DP <b>N</b> ED <b>W</b> CA <b>V</b> C <b>Q</b> NG <b>G</b> LL <b>C</b> CE <b>K</b> CP <b>K</b> V <b>F</b> HL <b>S</b> CH <b>V</b> PT <b>L</b> LS <b>F</b> ---SG <b>E</b> W <b>I</b> C <b>T</b> F <b>C</b> R <b>D</b> L <b>G</b> K <b>P</b> E <b>V</b> E <b>Y</b> <b>---</b>                                                 |
| HsTIF1-γ/TRIM33  | 884  | DP <b>N</b> ED <b>W</b> CA <b>V</b> C <b>Q</b> NG <b>G</b> LL <b>C</b> CE <b>K</b> CP <b>K</b> V <b>F</b> HL <b>S</b> CH <b>V</b> PT <b>L</b> LS <b>F</b> ---SG <b>E</b> W <b>I</b> C <b>T</b> F <b>C</b> R <b>D</b> L <b>G</b> K <b>P</b> E <b>V</b> E <b>Y</b> <b>---</b>                                                 |
| DmBonus          | 954  | G <b>S</b> E <b>K</b> SS <b>S</b> GE <b>---</b> -----L <b>S</b> A <b>E</b> L <b>L</b> Q <b>R</b> C <b>E</b> LY <b>Q</b> Y <b>Q</b> S <b>I</b> N <b>E</b> R <b>E</b> SP <b>A</b> NT <b>S</b> Y <b>E</b> T <b>I</b> <b>---</b>                                                                                                |
| HsTIF1-β/TRIM28  | 680  | G <b>S</b> LS <b>L</b> D <b>G</b> AD <b>S</b> T <b>G</b> V <b>V</b> AK <b>---</b> -----L <b>S</b> A <b>N</b> Q <b>R</b> K <b>C</b> ER <b>L</b> L <b>A</b> L <b>F</b> CH <b>-</b> E <b>P</b> CR <b>P</b> L <b>Q</b> L <b>A</b> D <b>T</b> F <b>S</b> L <b>D</b> Q <b>P</b> G <b>---</b>                                      |
| HsTIF1-δ*/TRIM66 | 1135 | DC <b>E</b> N <b>A</b> C <b>Y</b> N <b>Q</b> P <b>G</b> M <b>R</b> AS <b>P</b> G <b>---</b> -----L <b>S</b> M <b>Y</b> D <b>Q</b> K <b>C</b> E <b>L</b> L <b>S</b> CC <b>N</b> -N <b>E</b> S <b>I</b> F <b>F</b> E <b>P</b> V <b>S</b> PL <b>A</b> R <b>H</b> Y <b>Q</b> I <b>I</b> <b>---</b>                              |
| HsTIF1-α/TRIM24  | 881  | DC <b>D</b> AP <b>S</b> H <b>N</b> SE <b>K</b> K <b>T</b> E <b>G</b> L <b>V</b> K <b>L</b> EP <b>Q</b> K <b>R</b> K <b>C</b> ER <b>L</b> L <b>L</b> F <b>L</b> Y <b>C</b> H <b>-</b> E <b>S</b> I <b>A</b> F <b>O</b> D <b>P</b> V <b>P</b> L <b>V</b> P <b>D</b> Y <b>K</b> I <b>I</b> <b>---</b>                          |
| HsTIF1-γ/TRIM33  | 942  | DC <b>D</b> N <b>L</b> Q <b>H</b> S <b>K</b> K <b>G</b> K <b>T</b> A <b>Q</b> G <b>---</b> -----L <b>S</b> F <b>Q</b> D <b>O</b> R <b>K</b> C <b>E</b> R <b>L</b> L <b>L</b> F <b>L</b> Y <b>C</b> H <b>-</b> E <b>S</b> I <b>A</b> F <b>O</b> Q <b>E</b> P <b>V</b> A <b>I</b> P <b>N</b> Y <b>K</b> I <b>I</b> <b>---</b> |
| DmBonus          | 1004 | SS <b>P</b> S <b>E</b> D <b>V</b> I <b>R</b> TR <b>I</b> DP <b>S</b> SP <b>N</b> H <b>K</b> DI <b>A</b> GF <b>V</b> SD <b>V</b> R <b>L</b> I <b>S</b> NT <b>Y</b> L <b>F</b> Y <b>Q</b> ----- <b>---</b>                                                                                                                    |
| HsTIF1-β/TRIM28  | 736  | G <b>-</b> T <b>D</b> L <b>L</b> IR <b>A</b> R <b>L</b> GE <b>R</b> L <b>E</b> PP <b>Y</b> SS <b>T</b> Q <b>E</b> FA <b>Q</b> D <b>V</b> GR <b>E</b> K <b>F</b> N <b>L</b> T <b>E</b> <b>---</b> ----- <b>---</b>                                                                                                           |
| HsTIF1-δ*/TRIM66 | 1192 | RR <b>P</b> MD <b>L</b> SI <b>R</b> RR <b>L</b> CK <b>K</b> DP <b>A</b> HY <b>T</b> PE <b>E</b> V <b>S</b> D <b>V</b> R <b>L</b> EW <b>N</b> CA <b>F</b> N <b>Y</b> P <b>---</b> ----- <b>---</b>                                                                                                                           |
| HsTIF1-α/TRIM24  | 940  | R <b>R</b> PM <b>D</b> LS <b>I</b> IK <b>R</b> L <b>G</b> E <b>D</b> Y <b>S</b> -M <b>Y</b> S <b>K</b> PE <b>D</b> FA <b>E</b> F <b>R</b> L <b>I</b> EQ <b>N</b> CA <b>E</b> F <b>N</b> E <b>---</b>                                                                                                                        |
| HsTIF1-γ/TRIM33  | 998  | R <b>K</b> PM <b>D</b> LS <b>I</b> V <b>K</b> K <b>L</b> CK <b>K</b> H <b>Q</b> HY <b>Q</b> IE <b>D</b> DF <b>V</b> AD <b>V</b> R <b>L</b> IE <b>K</b> N <b>E</b> F <b>N</b> EM <b>M</b> K <b>V</b> Q <b>V</b> Y <b>A</b> D <b>T</b> Q <b>I</b> N <b>L</b> K <b>---</b>                                                     |
| DmBonus          | 1047 | EB <b>K</b> T <b>Y</b> SN <b>A</b> Y <b>L</b> E <b>N</b> FF <b>E</b> Q <b>L</b> AK <b>W</b> L <b>E</b> Q <b>F</b> E <b>G</b> T <b>K</b> P <b>Q</b> G <b>R</b> NT <b>S</b> NP <b>A</b> LL <b>G</b> V <b>N</b> AT <b>G</b> SP <b>S</b> P <b>---</b>                                                                           |
| HsTIF1-β/TRIM28  | 778  | - <b>D</b> K <b>A</b> D <b>V</b> CS <b>I</b> I <b>G</b> L <b>Q</b> R <b>F</b> F <b>T</b> RR <b>N</b> EA <b>G</b> Q <b>T</b> K <b>F</b> S <b>A</b> VL <b>V</b> EP <b>P</b> PP <b>S</b> LP <b>G</b> AG <b>L</b> S <b>Q</b> E <b>L</b> S <b>---</b>                                                                            |
| HsTIF1-δ*/TRIM66 | 1236 | - <b>D</b> SE <b>V</b> AE <b>A</b> CH <b>C</b> LE <b>V</b> FF <b>G</b> W <b>L</b> KE <b>H</b> Y <b>E</b> PE <b>K</b> R <b>F</b> A <b>Q</b> P <b>R</b> Q <b>E</b> DS <b>D</b> SE <b>V</b> SS <b>E</b> SG <b>S</b> T <b>P</b> Q <b>G</b> FP <b>W</b> PP <b>Y</b> M <b>---</b>                                                 |
| HsTIF1-α/TRIM24  | 982  | PD <b>S</b> E <b>V</b> AN <b>A</b> C <b>I</b> K <b>L</b> EN <b>F</b> EL <b>L</b> KN <b>Y</b> PE <b>K</b> RF <b>P</b> -K <b>P</b> E <b>F</b> R <b>N</b> E <b>S</b> ED <b>N</b> K <b>F</b> S <b>D</b> S <b>DD</b> DF <b>---</b>                                                                                               |
| HsTIF1-γ/TRIM33  | 1058 | AD <b>S</b> E <b>V</b> A <b>Q</b> AG <b>A</b> Y <b>A</b> L <b>F</b> E <b>K</b> TE <b>F</b> YS <b>D</b> RI <b>E</b> AP <b>L</b> PE <b>F</b> EO <b>E</b> DD <b>G</b> E <b>V</b> T <b>E</b> D <b>S</b> DE <b>D</b> F <b>---</b>                                                                                                |
| DmBonus          | 1102 | --- <b>H</b> EN <b>G</b> R <b>K</b> SC <b>G</b> S <b>A</b> SL <b>G</b> DS <b>D</b> G <b>A</b> CL <b>P</b> AK <b>R</b> R <b>A</b> RS <b>A</b> HE <b>---</b>                                                                                                                                                                  |
| HsTIF1-β/TRIM28  | 829  | --- <b>G</b> E <b>F</b> GD <b>G</b> P <b>---</b>                                                                                                                                                                                                                                                                            |
| HsTIF1-δ*/TRIM66 | 1295 | Q <b>E</b> G <b>I</b> Q <b>K</b> RR <b>R</b> RR <b>H</b> EN <b>E</b> RA <b>K</b> RM <b>S</b> F <b>R</b> L <b>A</b> NS <b>I</b> S <b>Q</b> V <b>---</b>                                                                                                                                                                      |
| HsTIF1-α/TRIM24  | 1033 | --- <b>V</b> Q <b>P</b> R <b>K</b> R <b>L</b> K <b>S</b> IE <b>R</b> Q <b>L</b> L <b>K</b> <b>---</b>                                                                                                                                                                                                                       |
| HsTIF1-γ/TRIM33  | 1110 | --- <b>I</b> O <b>F</b> RR <b>K</b> R <b>L</b> K <b>S</b> DER <b>P</b> V <b>H</b> I <b>K</b> <b>---</b>                                                                                                                                                                                                                     |



**Fig. S6. Alignment of Bonus-TIF1- $\gamma$ /TRIM33 subfamily proteins.** A) Color-coded schematic of domains and their location in Bonus-TIF1- $\gamma$ /TRIM33 subfamily proteins (RING - orange, BBOX - blue, BBC - green, PHD - crimson and BROMO - purple). B) Alignment of Bonus-TIF1- $\gamma$ /TRIM33 subfamily proteins. The background of an amino acid is shaded if the residue is identical (black) or similar (grey) at that position in at least three sequences. The color of an amino acid indicates the location of a functional domain following the coordinates shown in Table S2 and the color-scheme above.

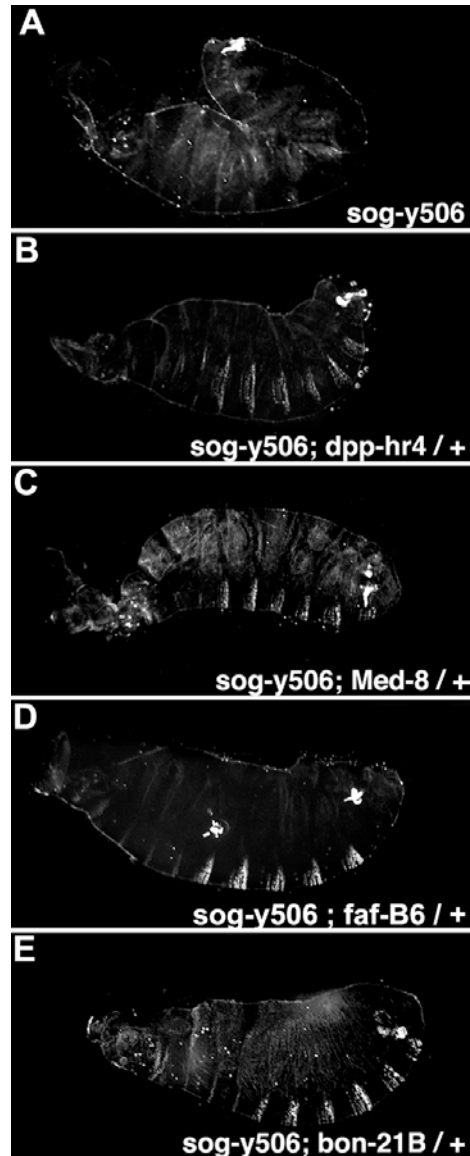

**Fig. S7. *bonus* zygotic heterozygosity partially suppresses *sog* hemizygous mutant phenotypes.** Cuticles in lateral view with anterior to the left and dorsal up. The maternally contributed allele is listed first. A) *sog*<sup>y506</sup> hemizygous dorsalized cuticle containing no denticles, U-shaped body, herniated head and Filzkörper defects. B) *sog*<sup>y506</sup> hemizygous and *dpp*<sup>hr4</sup> heterozygous cuticle with head and Filzkörper defects but partially restored denticles and body shape. C) *sog*<sup>y506</sup> hemizygous and *Medea*<sup>8</sup> heterozygous cuticle shows partial rescue. D) *sog*<sup>y506</sup> hemizygous and *fat facets*<sup>B6</sup> heterozygous cuticle shows partial rescue. E) *sog*<sup>y506</sup> hemizygous and *bonus*<sup>21B</sup> heterozygous cuticle shows partial rescue.

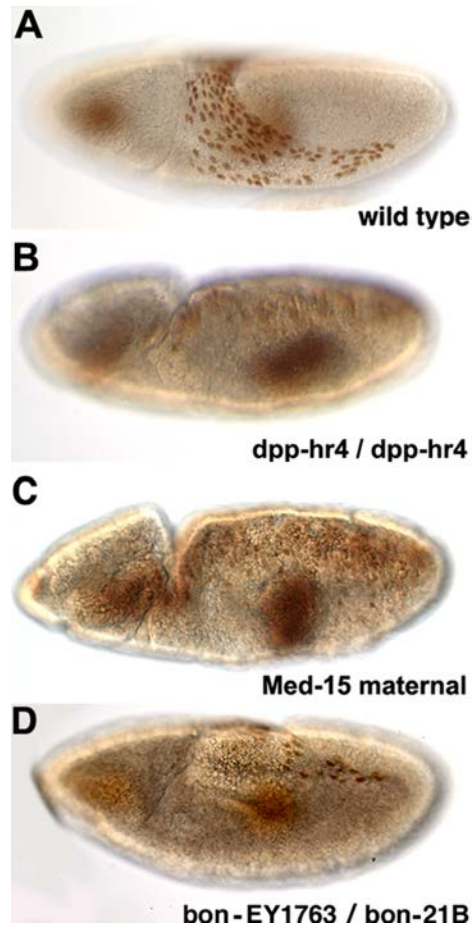

**Fig. S8. Loss of Hindsight amnioserosa but not foregut or hindgut expression in *bonus* zygotic mutants.** Stage 10 embryos in lateral view revealing Dpp-dependent Hindsight expression in amnioserosa cells. Dpp-independent Hindsight expression in the foregut and hindgut is visible below the plane of focus. The latter staining acts as an internal control and is observed in all genotypes. The maternally contributed allele is listed first. A) Wild type embryo. B) *dpp<sup>hr4</sup>* homozygous ventralized embryo with a few scattered amnioserosa cells. C) Ventralized maternal *Medea<sup>15</sup>* embryo is similar to the *dpp<sup>hr4</sup>* embryo with a few scattered amnioserosa cells. D) *bonus<sup>EY1763</sup>/bonus<sup>21B</sup>* transheterozygous embryo with a reduced number of amnioserosa cells

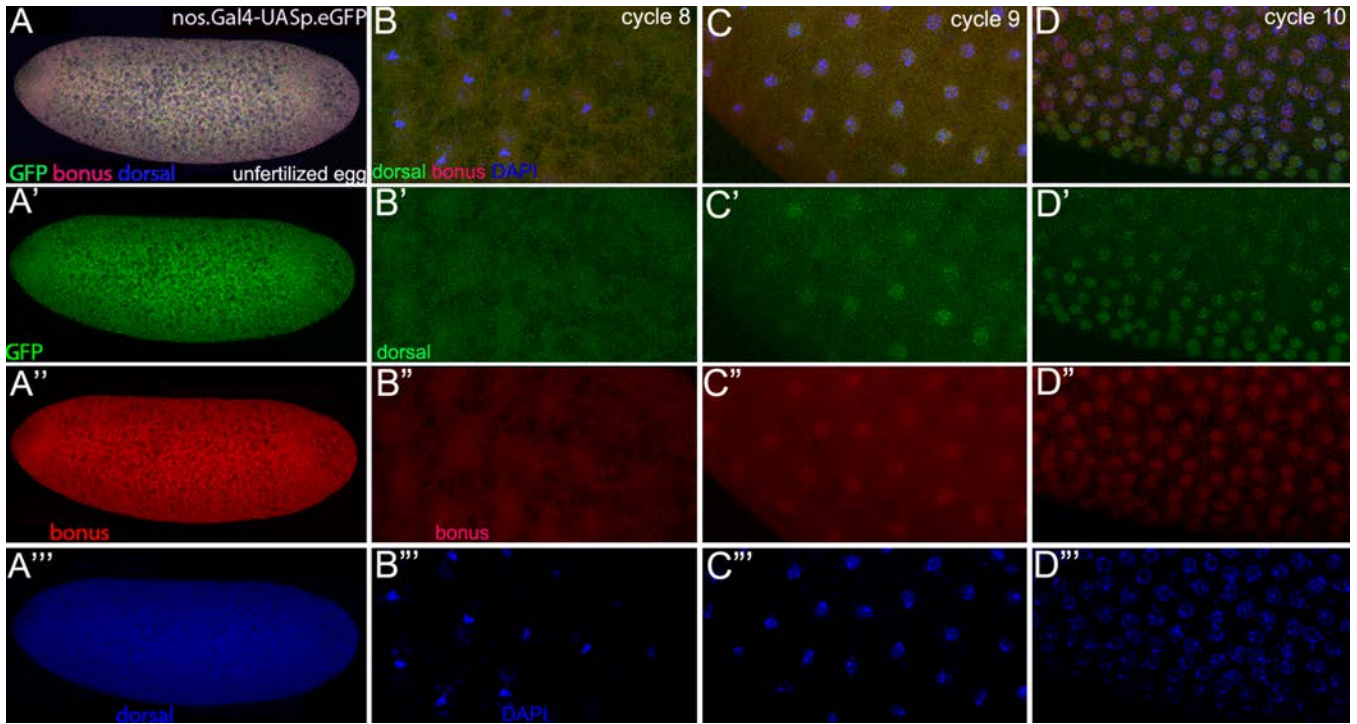

**Fig. S9. Bonus and Dorsal are maternally loaded and cytoplasmic in eggs then translocate synchronously into nuclei at cycle 9.** A) Unfertilized egg in lateral view from a female expressing UAS.eGFP under the control of the maternal driver nos.Gal4. Low magnification three-color and single channel images of eGFP (green), Bonus (red) and Dorsal (blue). All proteins are present and cytoplasmic. B-D) Wild type embryos in lateral view with ventral at the bottom. High magnification three color and single channel images of Dorsal (green), Bonus (red) and DAPI (blue). B) Cycle 8 embryo similar to Fig. 4A with uniformly cytoplasmic Dorsal and Bonus and uniformly nuclear DAPI. C) Cycle 9 embryo similar to Fig. 4B with cytoplasmic Dorsal toward the top (dorsal region) and a mix of nuclear and cytoplasmic Dorsal toward the bottom (ventral region) as well as a uniform mix of nuclear and cytoplasmic Bonus and uniformly nuclear DAPI. D) Cycle 10 embryo similar to Fig. 4C with cytoplasmic Dorsal toward the top (dorsal region) and nuclear Dorsal toward the bottom (ventral region) as well as uniformly nuclear Bonus and DAPI.

*bonus* exon1

A. nt16418861-16419766 Chromosome 3 sequence NT\_033777.2

▼ *bonus*<sup>21B</sup> deleted from +12 to past exon1 splice donor  
AAA**ATGG**GCTGAACATTTTTTTGTACAGAAGAAGCGTCCAACGAGAGCAAACGCCGTGAGACCGTG  
TGTTTTTCGCAGCGAATTACGCCAATAAAAACCGCACTAAGAGCGCGCTCGCAGCGCGAATAAAGA  
ATAGCAGCCGCGTATGGACGAAATGCGGCACGAATCGCTGGAAAAATCGACGGCCAGACCGAAA  
AATAGCAGCGAAATTCGAGCGAACGTCGTGTATAAGTAAAACGAAAGTTGTGTCGCTCTGTGCG  
AAAGAGAGAGGGAGAACCCAATATTTTTGCAAGCCAGAAGTCGAAGGTGAAATTTAAAATGCATT  
AGCCACCCAATTGAAGAGGAGTCAACTACGAACAAAACTTTAAGAATCAGCGAAAAATCGTTTG  
TGAACATCCATAACAAGCACAAATCGTTGTTTTTGCCTGCTCTCGTGTAGTTCCGTGTATTGGT  
GCGCGCGCCCTGTGTGTGTTTGTGCGTGTGCGTGTGCGTGTAAAGCATTGGAATGGATTAACACCC  
AACTAATTCAAAACAATAATACCGCAACATAATCGCAATAGTCATGCCGTTTCAAGGCGACAG  
CCTTTAGGGAAACATTCGGTTCGGTTCGGTTCAGTCAACCAAAAATCAGTTGCTATAATTAGCACGC  
CCACGTTTTAATTTCAACGATCGCCAGCAACCGCCTACGCGGTTAAATCGCAGGACTTCGCCAA  
CATGGATATGGATTTGGAGCAGCTAAAGAACGACTTCCTGCCGTTATCGCCGGGATCAAGCAG  
GAGCAGCTGGATGCCGTGCCACGGATGCCCTGCCCCAGATGAGCACACCAAACACGGCCAGCG  
GTGCGCCACAACCTCGTCATTGAGCTCCTCTTCGCTGAGTCTGAGCAACCCCTGCGACAGTGC  
CGAGAAAAG

B. translated

▼ *bonus*<sup>21B</sup> deleted from +12 to past exon 1 splice donor  
K **M** A E H F L Y R R S V Q R E Q T P \* D R V F S Q R I T P I K P  
H \* E R A R S A N K E \* Q P R M D E M R H E S L E K S T A R P K  
N S S E I R A N V V Y K \* N E S C V A L C E R E R E N P I F L Q  
A R S R R \* N \* N A L A T Q L K R S Q L R T K L \* E S A K N R L  
\* T S I Q A Q I V V F A C S R V V P V Y W C A R P V C V C A C A  
C V \* A L E W I N Y P T N S K T I I P Q H N R N S H A V S R R Q  
P L G K H S V G R S V N Q K S V A I I S T P T F \* F Q R S P A T  
A Y A V K S Q D F A N **M D M D L E Q L K N D F L P L I A G I K Q**  
**E Q L D A V P T D A L P Q M S T P N T A S G A P T T S S L S S S**  
**S L S L S N P C D S A E K**

**Fig. S10. Cryptic methionine in *bonus*<sup>21B</sup> may yield a nearly full-length protein.** A) Complete DNA sequence of *bonus* exon1 indicating the start of the deletion in *bonus*<sup>21B</sup> and the presence of a start codon (bold) in the remaining transcribed sequence. Sequences encoding the Bonus open reading frame are in red. B) Translation of *bonus* exon1 revealing the cryptic Methionine (bold) and the 66 amino acids of the Bonus protein (red) that would be missing if the cryptic Methionine were able to splice into exon2 in frame. Previously Table S2 showed that the Ring domain of Bonus begins at amino acid 83 and thus none of the defined domains are located in the deleted region of exon1.

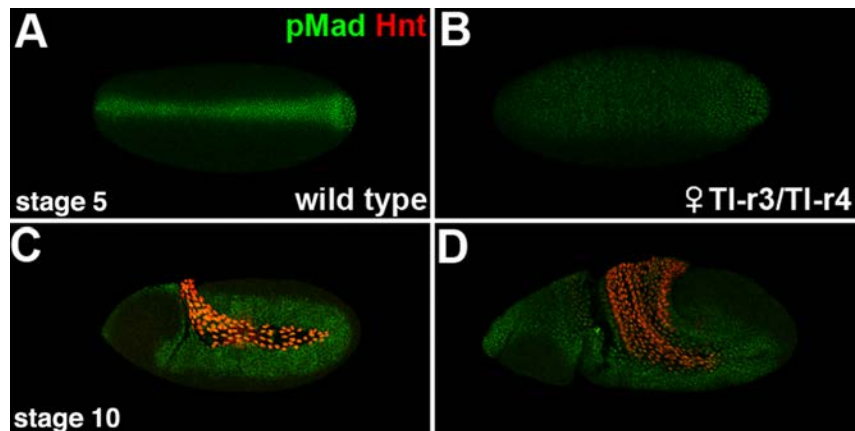

**Fig. S11. Reduction in maternal Toll signaling leads to expanded pMad and Hindsight expression.** A) Stage 5 wild type embryo in dorsal view displaying a sharp dorsal nuclear stripe of pMad expression. B) Stage 5 embryo in dorsal view from a *Toll<sup>r3</sup>/Toll<sup>r4</sup>* female mated to a wild type male. The reduction in maternal Toll signaling associated with these loss of function alleles is reflected in a broad, ventrally expanded pMad stripe. C) Stage 10 wild type embryo in lateral view displaying Hindsight in the amnioserosa and a wide, lateral ectoderm stripe of pMad. D) Stage 10 embryo in lateral view from a *Toll<sup>r3</sup>/Toll<sup>r4</sup>* female mated to a wild type male. The reduction in maternal Toll signaling is reflected in the ventral expansion of both Hindsight and pMad.

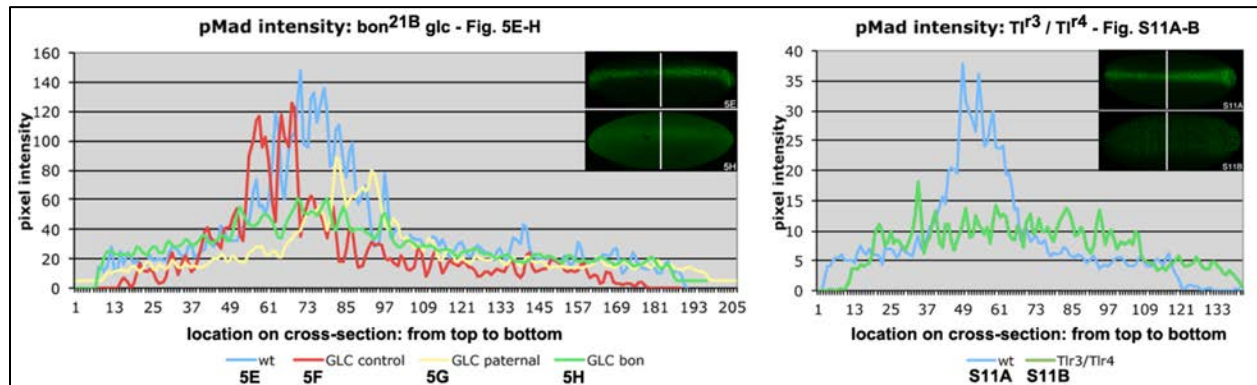

**Fig. S12. *Bonus*<sup>21B</sup> germline clone and maternal *Toll*<sup>3</sup>/*Toll*<sup>4</sup> similarly effect pMad expression.** Pixel intensities along a cross section from top to bottom on each image are shown from left to right in each graph employing arbitrary units. Left: Intensities for the green (pMad) channel from each of the four genotypes shown in Fig. 5E-H are graphed. The wild type and *bonus*<sup>21B</sup> germline clone embryos with the location of their cross section lines are shown as insets. The legend indicates the color associated with each genotype. Right: Intensities for the green (pMad) channel from the two genotypes shown in Fig. S11A,B are graphed. The wild type and maternal *Toll*<sup>3</sup>/*Toll*<sup>4</sup> embryos with the location of their cross section lines are shown as insets. Note that in both graphs the blue peak (wild type) is considerably narrower and sharper than the green peak (*bonus*<sup>21B</sup> germline clones or maternal *Toll*<sup>3</sup>/*Toll*<sup>4</sup>).





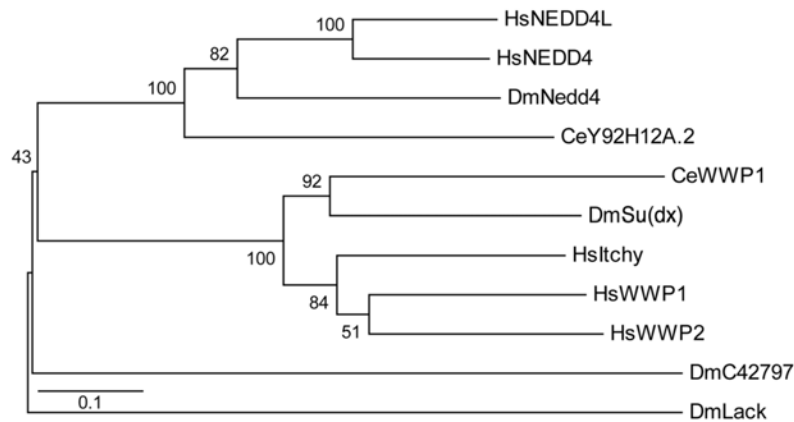

**Fig. S14. Maximum likelihood tree of fly Nedd4 and closely related proteins.** An unrooted tree generated from an alignment of the eleven sequences from human (Hs), fly (Dm) and nematode (Ce) most closely related to *Drosophila* Nedd4. These are all C2 and WW domain containing HECT class E-3 ubiquitin ligases (Grau-Bové et al., 2013). The statistically supported Nedd4 cluster contains a single member in flies and nematodes with two in humans.

Accession numbers (we employed the longest isoform as noted):

CeWWP1-NP\_740775 (isoformA)

CeY92H12A.2-NP\_490865

DmC42797-NP\_001188572 (isoformE)

DmLack/dSmurf-NP\_523779 (isoformA)

DmNedd4-NP\_648993 (isoformJ)

DmSu(dx)-NP\_722753 (isoformA)

HsItchy-NP\_001244066 (isoform1)

HsNEDD4-NP\_006145 (isoform1)

HsNEDD4L-NP\_001138439 (isoform1)

HsWWP1-NP\_008944

HsWWP2-NP\_001257383 (isoformFL)

Grau-Bové X, Sebé-Pedrós A, Ruiz-Trillo I. 2013. A genomic survey of HECT ubiquitin ligases in eukaryotes reveals independent expansions of the HECT system in several lineages. *Genome Biol Evol.* 5:833-847.
